# Supplementary material
Source: MDPI journal article supplement (https://www.mdpi.com/1999-4907/14/2/262)
Supplement: s1 [file s1]

**Table S1**

Summary of biotic and abiotic variables used in our study. Mean and range (in parentheses)

| Properties         | Definition                    | Units   | Broadleaf mixed forest          | Coniferous and broadleaf mixed forest | Coniferous mixed forest        |
|--------------------|-------------------------------|---------|---------------------------------|---------------------------------------|--------------------------------|
| No. of plots       |                               |         | 149                             | 71                                    | 48                             |
| Dominant species   |                               |         | <i>Cyclobalanopsis glauca</i>   | <i>Pinus massoniana</i>               | <i>Pinus massoniana</i>        |
|                    |                               |         | <i>Cinnamomum camphora</i>      | <i>Pinus taiwanensis</i>              | <i>Cunninghamia lanceolata</i> |
|                    |                               |         | <i>Liquidambar formosana</i>    | <i>Cyclobalanopsis glauca</i>         | <i>Pinus taiwanensis</i>       |
|                    |                               |         | <i>Castanea henryi</i>          | <i>Cunninghamia lanceolata</i>        | <i>Cryptomeria fortunei</i>    |
|                    |                               |         | <i>Schima superba</i>           | <i>Lindera aggregata</i>              |                                |
|                    |                               |         | <i>Castanopsis sclerophylla</i> | <i>Schima superba</i>                 |                                |
| AWC                | Aboveground wood carbon       | t/ha    | 63.44(0.37,156.09)              | 45.82(0.45,162.22)                    | 46.44(0.88,138.72)             |
| elevation          |                               | m       | 780.08(30,1427)                 | 718.04(95,1490)                       | 688.58(6.00,1305.00)           |
| slope              |                               | °       | 36.14(15,50)                    | 33.93(13,48)                          | 29.54(7,45)                    |
| Age                | Stand age                     | year    | 28(4,60)                        | 25(7,52)                              | 30(5,54)                       |
| Shannon's index    | Shannon index of tree species |         | 2.02(0.99,2.57)                 | 1.83(0.43,2.55)                       | 1.56(0.71,2.41)                |
| Fdis               | Functional diversity          |         | 0.09(0.06,0.18)                 | 0.10(0.03,0.13)                       | 0.09(0.04,0.12)                |
| PD                 | Phylogenetic diversity        |         | 1447.97(325.05,2217.06)         | 1379.24(451.87,2055.63)               | 1219.58(776.92,1753.35)        |
| DBHcv              | DBH variation                 |         | 0.43(0.12,0.97)                 | 0.46(0.21,0.83)                       | 0.482(0.25,0.72)               |
| DBH diversity      | Shannon index of DBH          |         | 1.69(0.69,2.65)                 | 1.63(0.56,2.48)                       | 1.84(0.72,2.46)                |
| Stand density      | Stems in a plot               | stem/ha | 3093.60(30.00,6497.94)          | 2534.34(60.00,6539.94)                | 2341.23(180.00,5324.95)        |
| CWM <sub>H</sub>   | CWM of height                 |         | 20.74(15.93,35.07)              | 24.63(14.64,38.91)                    | 28.09(19.69,40.21)             |
| CWM <sub>SLA</sub> | CWM of specific leaf area     |         | 19.57(12.35,31.80)              | 18.70(14.88,23.06)                    | 17.60(13.52,21.12)             |
| CWM <sub>WD</sub>  | CWM of wood density           |         | 0.53(0.41,0.69)                 | 0.48(0.34,0.55)                       | 0.43(0.33,0.54)                |
| MAT                | Mean annual temperature       | °C/year | 16.62(13.82,18.67)              | 16.76(14.06,18.67)                    | 16.81(13.89,18.72)             |

|     |                            |         |                           |                          |                          |
|-----|----------------------------|---------|---------------------------|--------------------------|--------------------------|
| MAP | Mean annual precipitation  | mm/year | 1938.78(1470.852,2476.23) | 1898.53(1469.10,2489.74) | 1839.29(1415.72,2361.67) |
| AHM | Annual heat-moisture index | mm/year | 556.83(400.00,774.10)     | 572.80(384.90,776.00)    | 594.16(404.10,789.50)    |

---

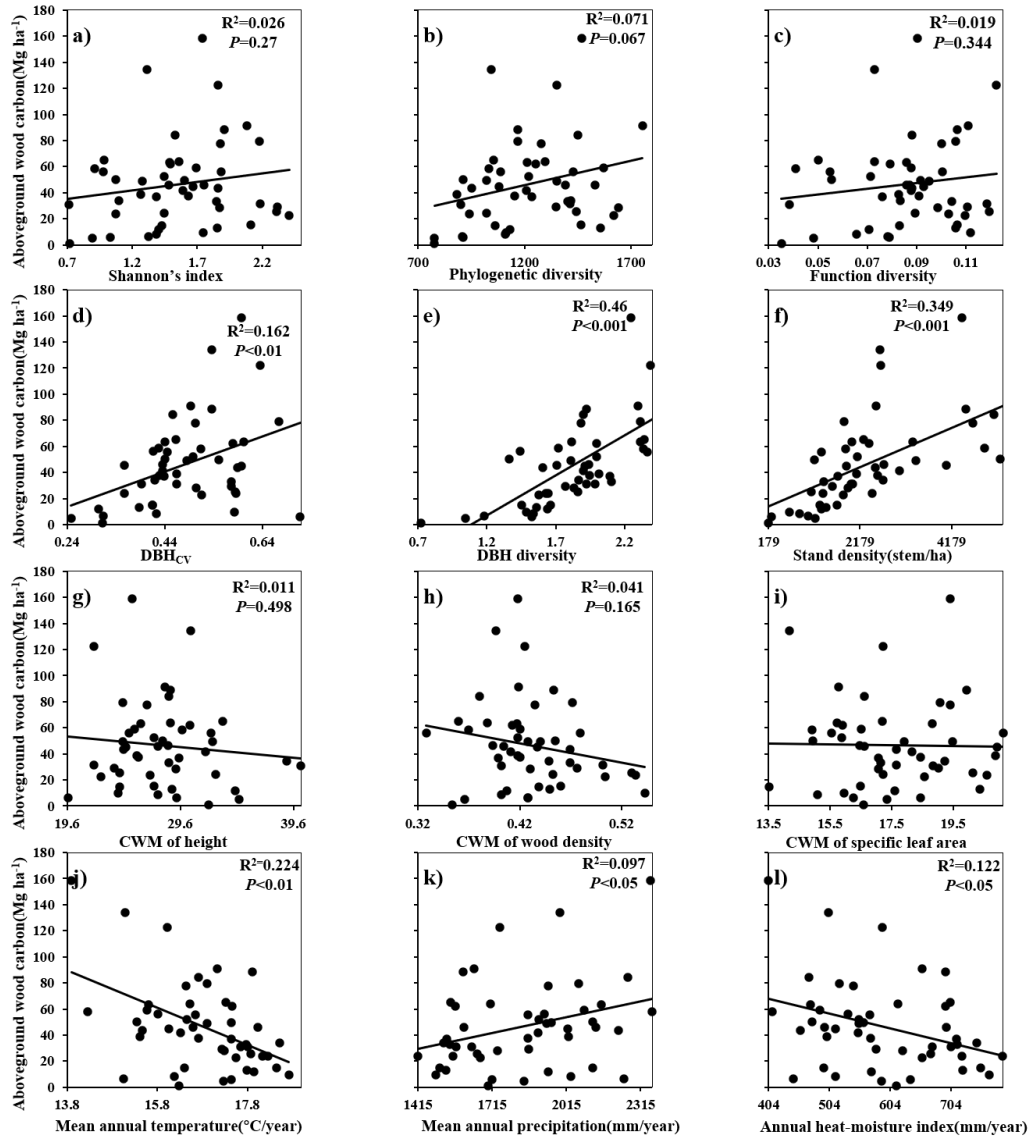

**Fig. S1.** Relationship between aboveground wood carbon and all variables in coniferous mixed forest (CMF).

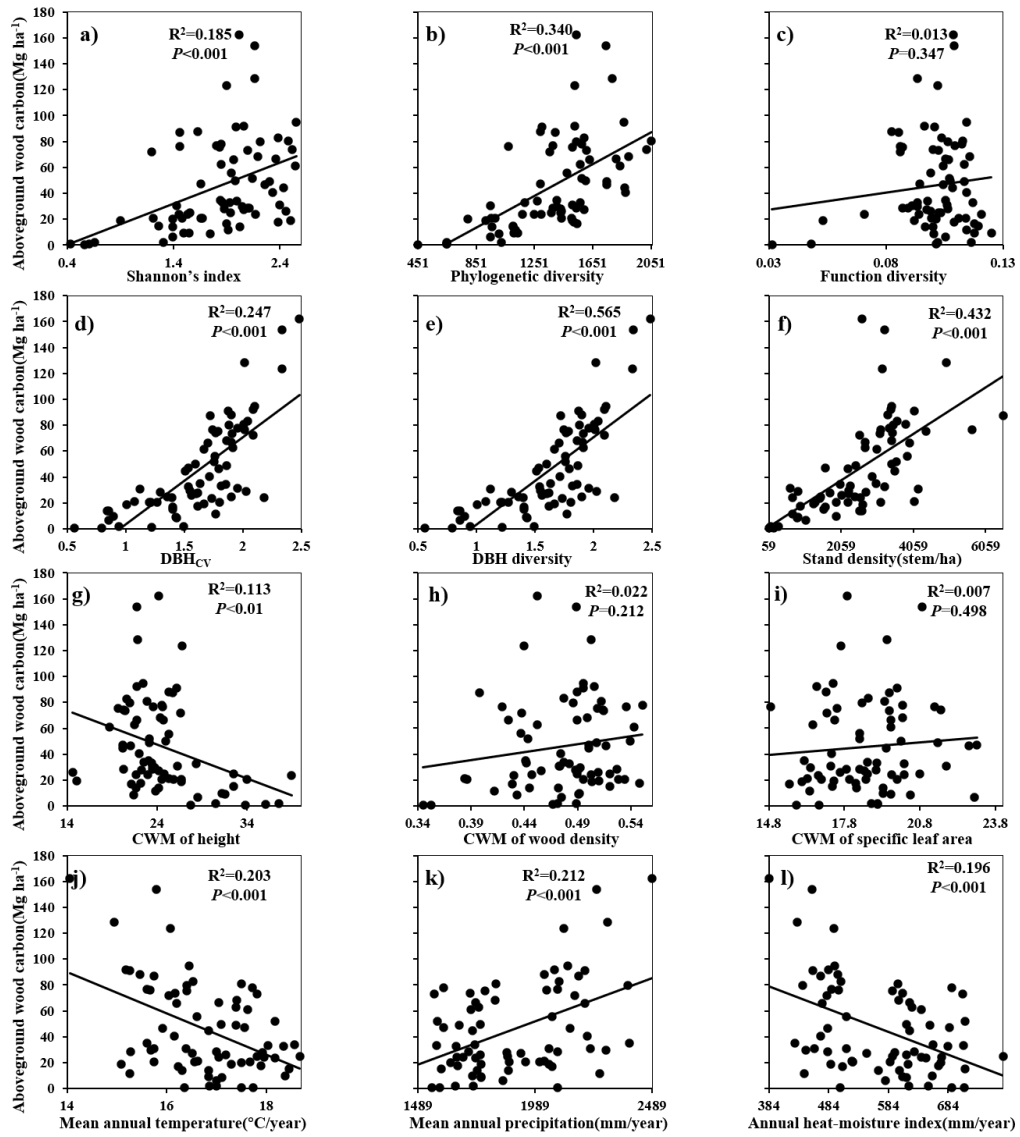

**Fig. S2.** Relationship between aboveground wood carbon and all variables in coniferous and broadleaf mixed forest (CBMF).

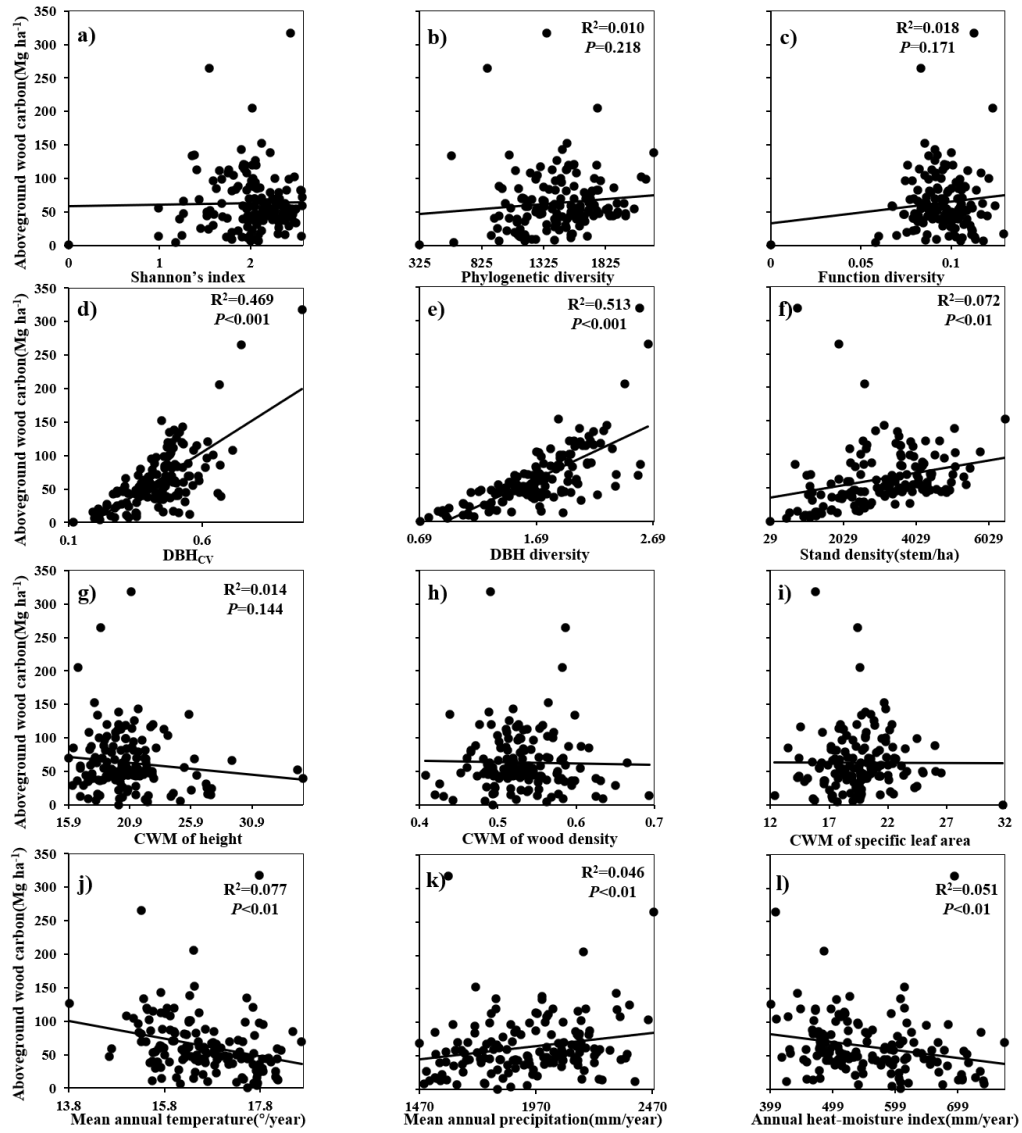

**Fig. S3.** Relationship between aboveground wood carbon and all variables in broadleaf mixed forest

(BMF).

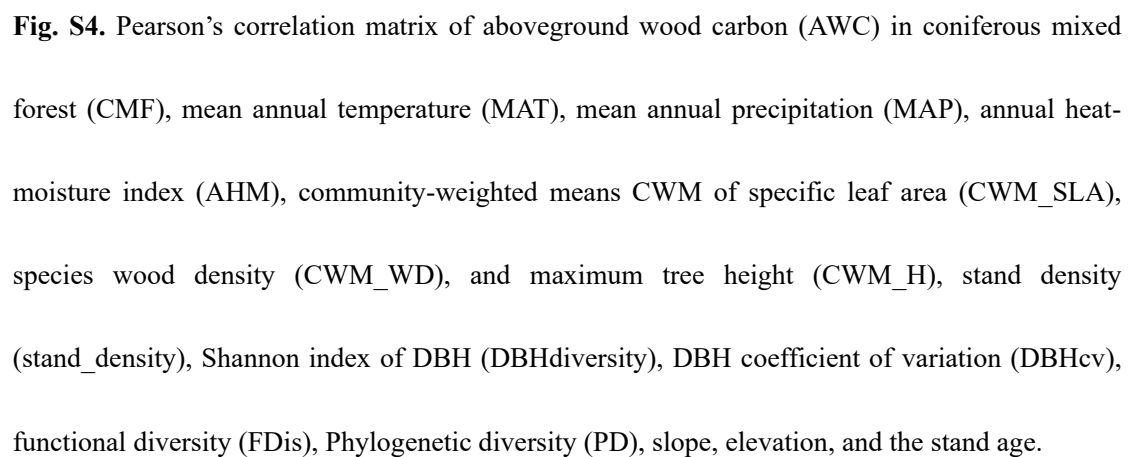

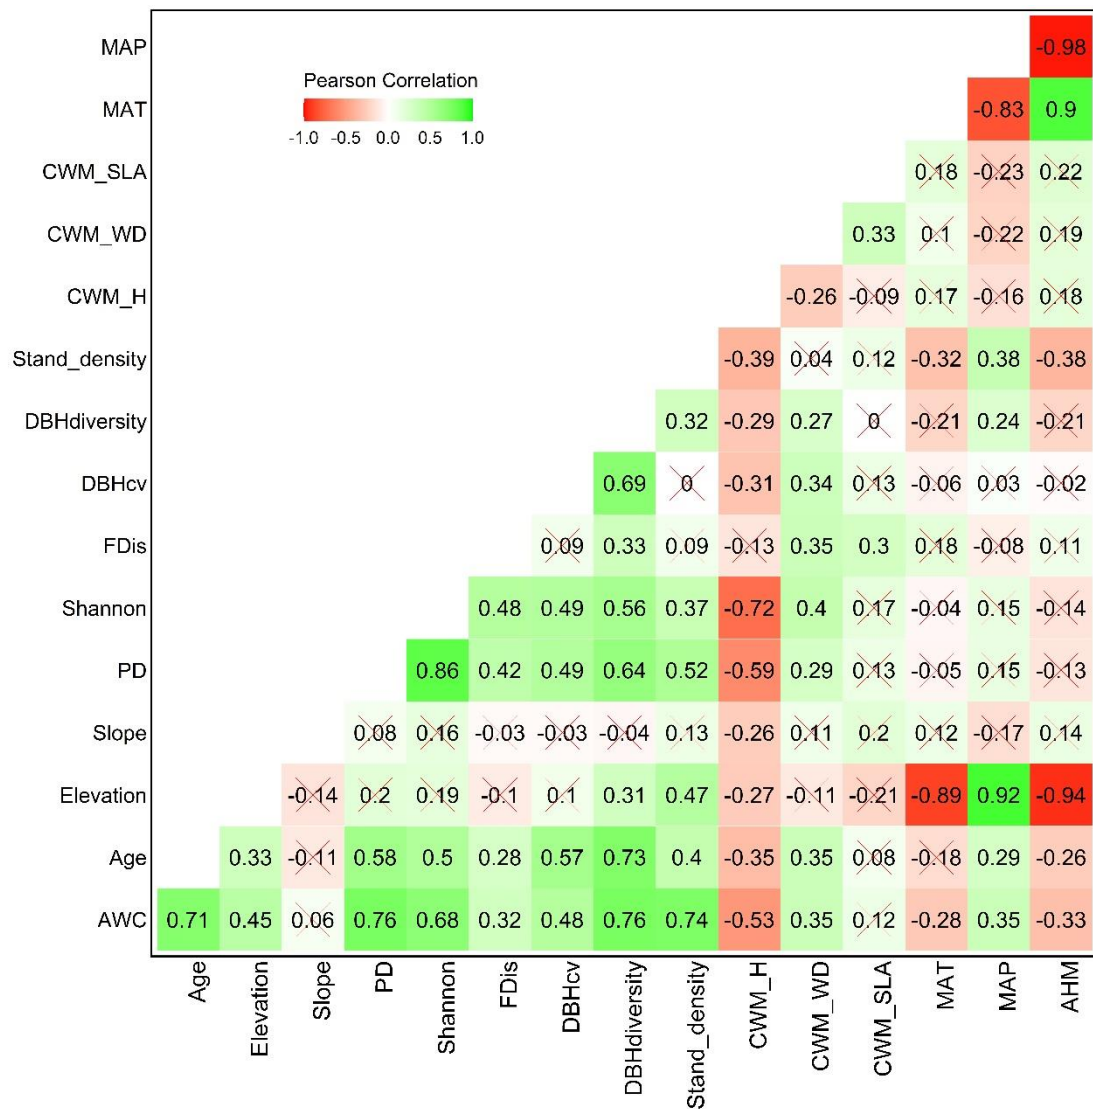

**Fig. S5.** Pearson's correlation matrix of aboveground wood carbon (AWC) in coniferous and broadleaf mixed forest (CBMF), mean annual temperature (MAT), mean annual precipitation (MAP), annual heat-moisture index (AHM), community-weighted means CWM of specific leaf area (CWM\_SLA), species wood density (CWM\_WD), and maximum tree height (CWM\_H), stand density (stand\_density), Shannon index of DBH (DBHdiversity), DBH coefficient of variation (DBHcv), functional diversity (FDis), Phylogenetic diversity (PD), slope, elevation, and the stand age.

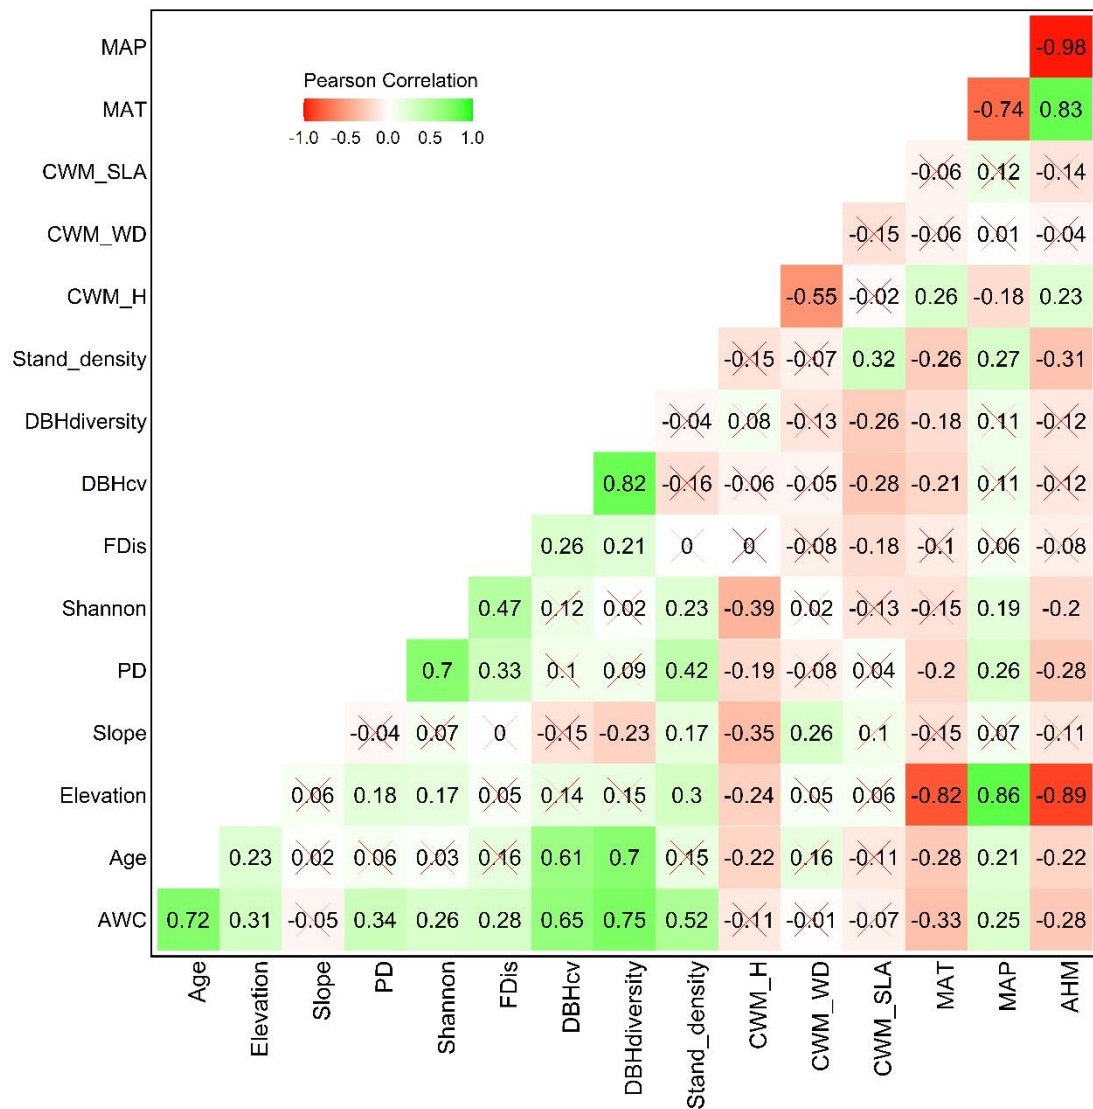

**Fig. S6.** Pearson's correlation matrix of aboveground wood carbon (AWC) in broadleaf mixed forest (BMF), mean annual temperature (MAT), mean annual precipitation (MAP), annual heat-moisture index (AHM), community-weighted means CWM of specific leaf area (CWM\_SLA), species wood density (CWM\_WD), and maximum tree height (CWM\_H), stand density (stand\_density), Shannon index of DBH (DBHdiversity), DBH coefficient of variation (DBHcv), functional diversity (FDis), Phylogenetic diversity (PD), slope, elevation, and the stand age.



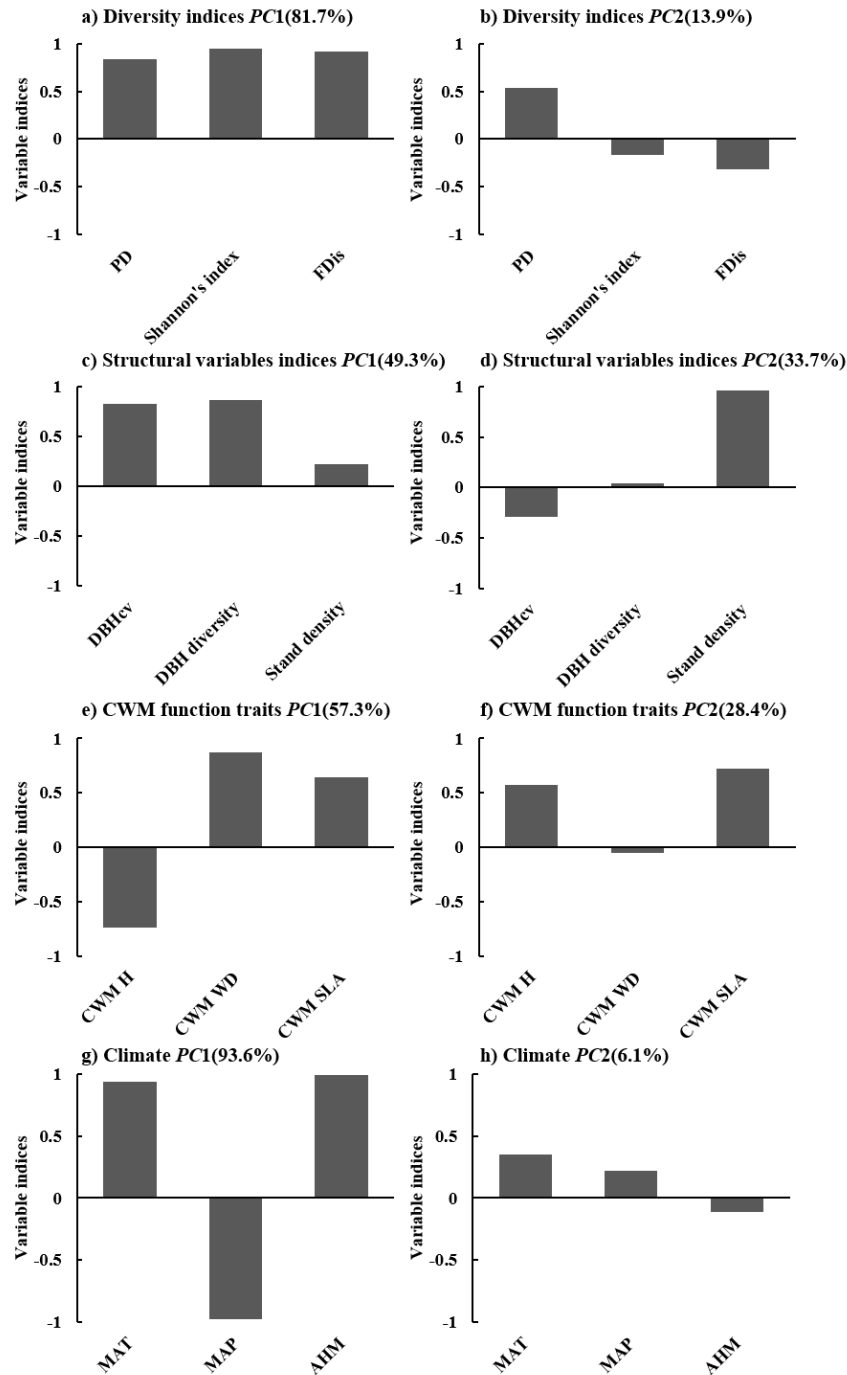

**Fig. S7.** Principal Component Analysis (PCA) for diversity variables, structure variables, CWM function traits and Climate variables in coniferous mixed forest (CMF). Bar plots show the loadings of different soil chemical properties and topographic variables on *PC1* and *PC2*. Values in parentheses indicate the variance (%) accounted for by each axis.

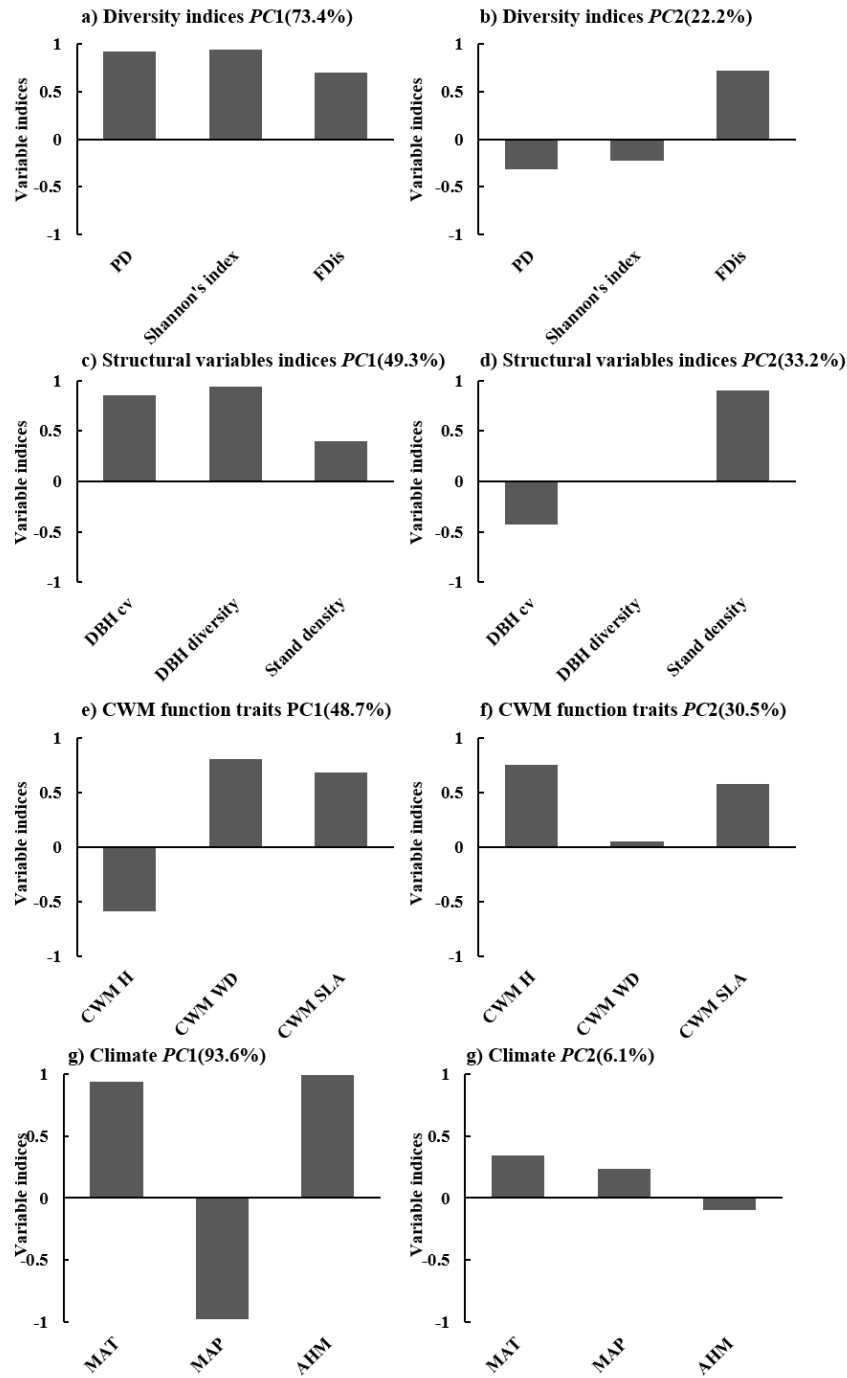

**Fig. S8.** Principal Component Analysis (PCA) for diversity variables, structure variables, CWM function traits and Climate variables in coniferous and broadleaf mixed forest (CBMF). Bar plots show the loadings of different soil chemical properties and topographic variables on PC1 and PC2. Values in parentheses indicate the variance (%) accounted for by each axis.

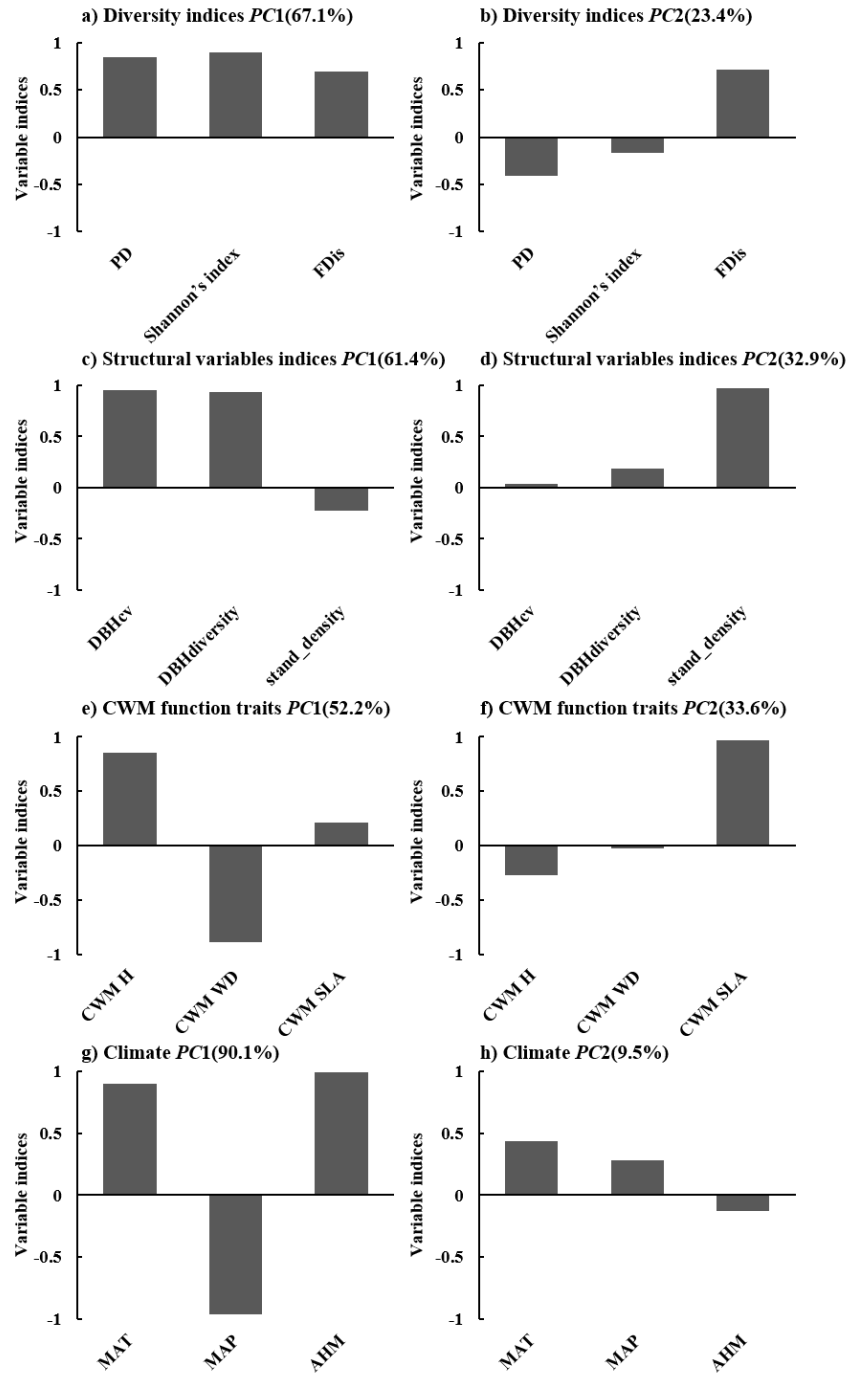

**Fig. S9.** Principal Component Analysis (PCA) for diversity variables, structure variables, CWM function traits and Climate variables in broadleaf mixed forest (BMF). Bar plots show the loadings of different soil chemical properties and topographic variables on PC1 and PC2. Values in parentheses indicate the variance (%) accounted for by each axis.



Table S2

The direct, indirect, and total standardized effects of climate*PCI*, Age, structure*PCI*, function*PCI*, diversity*PCI* and aboveground wood carbon based on the structural equation models (SEMs). The SEMs are presented in Fig.5. Significant effects ( $P < 0.05$ ) are indicated in bold.

| Predictor            | Pathway to aboveground wood carbon                            | model 5a |                  | model 5b |                  | model 5c |                  |
|----------------------|---------------------------------------------------------------|----------|------------------|----------|------------------|----------|------------------|
|                      |                                                               | Effect   | p-value          | Effect   | p-value          | Effect   | p-value          |
| Climate <i>PCI</i>   | Direct effect                                                 | -0.174   | <b>0.017</b>     | -0.237   | <b>0.001</b>     | -0.081   | 0.052            |
|                      | Indirect effect via Structure <i>PCI</i>                      | -0.073   | 0.342            | -0.020   | 0.642            | 0.011    | 0.441            |
|                      | Indirect effect via Structure <i>PCI</i> &Function <i>PCI</i> | -0.006   | 0.445            | 0.000    | 0.710            | 0.001    | 0.483            |
|                      | Indirect effect via Diversity <i>PCI</i>                      | 0.034    | 0.389            | 0.029    | 0.407            | -0.047   | <b>0.019</b>     |
|                      | Indirect effect via Diversity <i>PCI</i> &Function <i>PCI</i> | -0.019   | 0.398            | 0.007    | 0.451            | 0.002    | 0.268            |
|                      | Indirect effect via Function <i>PCI</i>                       | -        | -                | 0.025    | 0.216            | -        | -                |
|                      | Total effect                                                  | -0.238   | 0.256            | -0.197   | 0.052            | -0.114   | <b>0.017</b>     |
| Age                  | Direct effect                                                 | -0.022   | 0.834            | 0.151    | 0.149            | 0.425    | <b>&lt;0.001</b> |
|                      | Indirect effect via Structure <i>PCI</i>                      | 0.521    | <b>&lt;0.001</b> | 0.395    | <b>&lt;0.001</b> | 0.153    | <b>&lt;0.001</b> |
|                      | Indirect effect via Structure <i>PCI</i> &Function <i>PCI</i> | 0.040    | 0.215            | 0.009    | 0.540            | 0.016    | 0.119            |
|                      | Indirect effect via Diversity <i>PCI</i>                      | 0.093    | 0.062            | 0.189    | <b>0.004</b>     | 0.009    | 0.628            |
|                      | Indirect effect via Diversity <i>PCI</i> &Function <i>PCI</i> | -0.053   | 0.084            | 0.043    | 0.127            | 0.000    | 0.651            |
|                      | Indirect effect via Function <i>PCI</i>                       | -0.095   | 0.073            | -        | -                | -0.032   | 0.092            |
|                      | Total effect                                                  | 0.483    | <b>0.002</b>     | 0.787    | <b>&lt;0.001</b> | 0.570    | <b>&lt;0.001</b> |
| Structure <i>PCI</i> | Direct effect                                                 | 0.744    | <b>&lt;0.001</b> | 0.534    | <b>&lt;0.001</b> | 0.228    | <b>&lt;0.001</b> |
|                      | Indirect effect via Function <i>PCI</i>                       | 0.058    | 0.207            | 0.012    | 0.539            | 0.024    | 0.115            |

|                      |                                         |        |                  |       |                  |        |                  |
|----------------------|-----------------------------------------|--------|------------------|-------|------------------|--------|------------------|
| Diversity <i>PCI</i> | Total effect                            | 0.802  | <b>&lt;0.001</b> | 0.546 | <b>&lt;0.001</b> | 0.252  | <b>&lt;0.001</b> |
|                      | Direct effect                           | 0.281  | <b>0.004</b>     | 0.334 | <b>0.001</b>     | 0.221  | <b>&lt;0.001</b> |
|                      | Indirect effect via Function <i>PCI</i> | -0.160 | <b>0.015</b>     | 0.075 | 0.112            | -0.010 | 0.221            |
| Function <i>PCI</i>  | Total effect                            | 0.121  | 0.146            | 0.409 | <b>&lt;0.001</b> | 0.211  | <b>&lt;0.001</b> |
|                      | Direct effect                           | -0.270 | <b>0.006</b>     | 0.144 | 0.087            | 0.078  | 0.064            |
|                      | Indirect                                | -      | -                | -     | -                | -      | -                |
|                      | Total effect                            | -0.270 | <b>0.006</b>     | 0.144 | 0.087            | 0.078  | 0.064            |

---
